# Supplementary material for: Polymerization boosting cascade energy transfer based on opened glucopyranosyl β-cyclodextrin
Source: Royal Society of Chemistry journal article supplement (doi:10.1039/d2cc06908c), 2023-01-01
Supplement: d2cc06908c2.pdf [file d2cc06908c2.pdf]

## Supporting Information

### Polymerization Boosting Cascade Energy Transfer Based on Opened

### Glucopyranosyl $\beta$ -cyclodextrin

Jie Yu,<sup>a</sup> Hui Wang,<sup>a</sup> Xian-Yin Dai,<sup>a</sup> Jie Niu<sup>a</sup> and Yu Liu<sup>ab\*</sup>

<sup>a</sup>Department of Chemistry, State Key Laboratory of Elemento-Organic Chemistry,

Nankai University Tianjin 300071, P. R. China

<sup>b</sup>Haihe Laboratory of Sustainable Chemical Transformations, Tianjin 300192, China

E-mail: [yuliu@nankai.edu.cn](mailto:yuliu@nankai.edu.cn)

## Materials and methods

$\beta$ -cyclodextrin was purchased from Wako Company, the other chemicals and solvents were commercially available. The reaction was monitored using analytical thin layer chromatography (TLC). 200-300 mesh silica gel was applied in column chromatography. Both  $^1\text{H}$  NMR and  $^{13}\text{C}$  NMR spectrums were collected from Bruker Avance spectrometers, TMS as an internal standard. Varian Cary Eclipse fluorescence spectrometer and HITACHI fluorescence spectrophotometer (F-4600S) were applied to investigate the steady-state fluorescence spectrum. X-ray photoelectron spectroscopy (XPS) were collected on an instrument (Kratos Analytical Ltd.-Axis Ultra DLD) with monochromatized Al  $K\alpha$  X-ray source. The rheological properties of the hydrogel were performed on the AR-G2 rheometer (TA instruments, Etten-Leur, The Netherlands) equipped with 11 steel cone geometry of 20 mm diameter and a solvent trap. TEM pictures were investigated by a high-resolution transmission electron microscope (Philips Tecnai G2 20 S-TWIN microscope).

### 1. The Synthesis of aldehyde- $\beta$ -cyclodextrin (ACD)

ACD was synthesized according to Mao and Ostrikov reported method.<sup>1</sup>

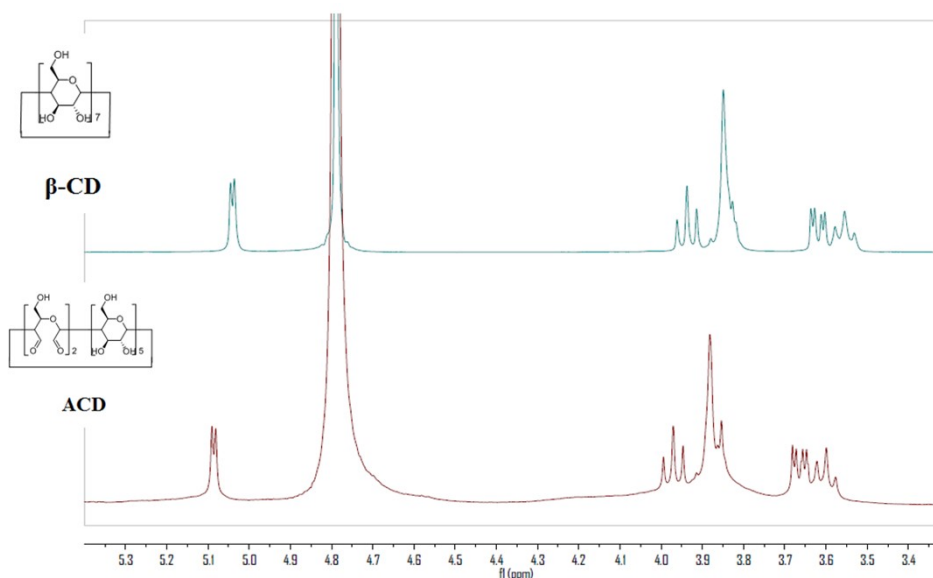

**Figure S1.**  $^1\text{H}$  NMR (400 MHz) spectrum of  $\beta$ -CD and ACD in  $\text{D}_2\text{O}$  at room temperature.

## 2. The preparation of ACD/CS hydrogel:

Chitosan (100 mg, Deacetylation degree  $\geq 95\%$ , Viscosity: 100-200 mpa.s) was added in 2% acetic acid solution (5 mL), stirring for 1 hour until it is completely dissolved. ACD was added to the Chitosan solution and stirred for 30 minutes, after that, the solution was heated to 50 °C for 1 hour to give hydrogel.

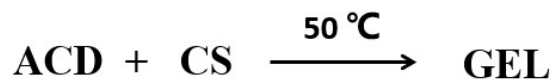

| Sample | CS/mg | ACD/mg |     |
|--------|-------|--------|-----|
| 1      | 100   | 0      |     |
| 2      | 100   | 30     |     |
| 3      | 100   | 50     |     |
| 4      | 100   | 70     |     |
| 5      | 100   | 90     |     |
| 6      | 100   | 100    | Gel |

**Table S1.** The condition for the formation of ACD/CS hydrogel.

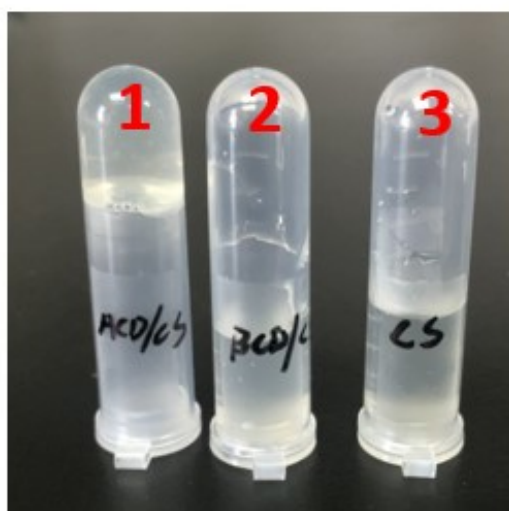

**Figure S2.** The pictures of 1)ACD/CS, 2)β-CD/CS and 3)CS.

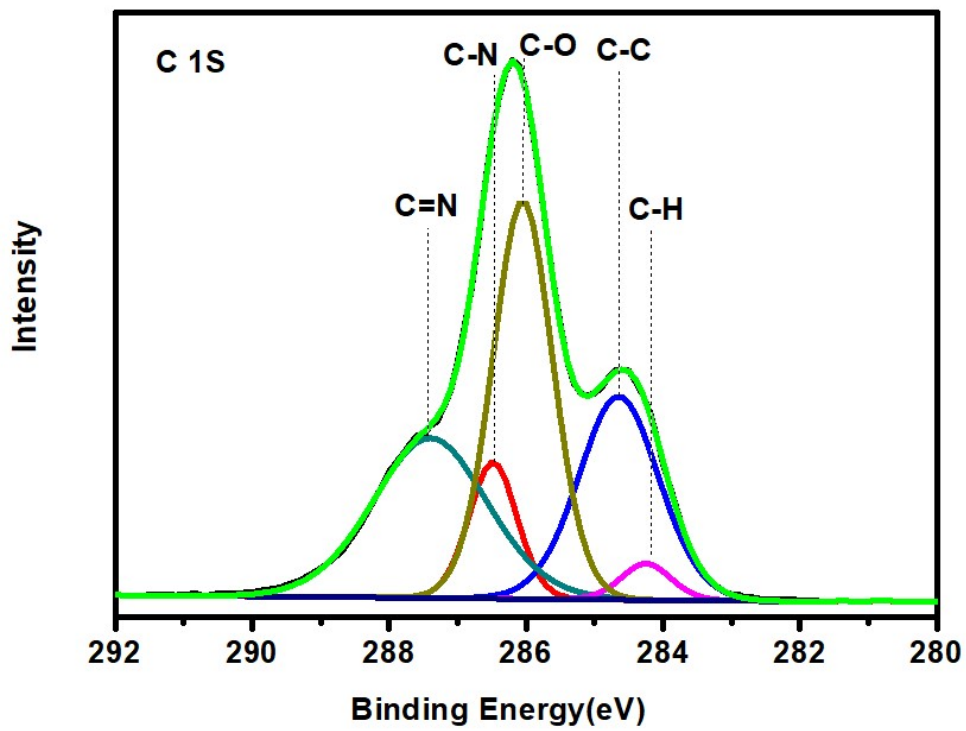

Figure S3. C1s X-ray photoelectron spectrum of ACD/CS

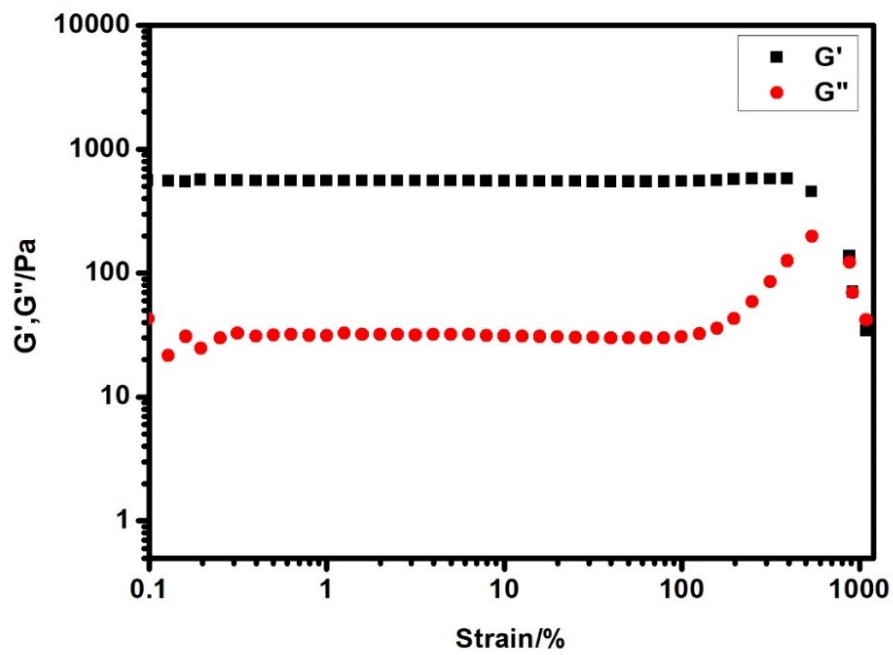

Figure S4. Strain sweep test of ACD/CS hydrogel ( $\omega = 1.00$  Hz).

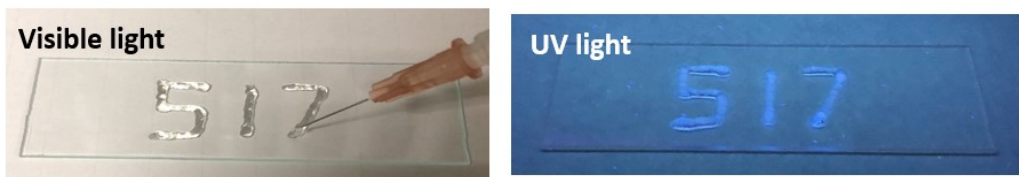

**Figure S5.** ACD/CS hydrogel was injected on glass plate under visible light and UV light (365 nm).

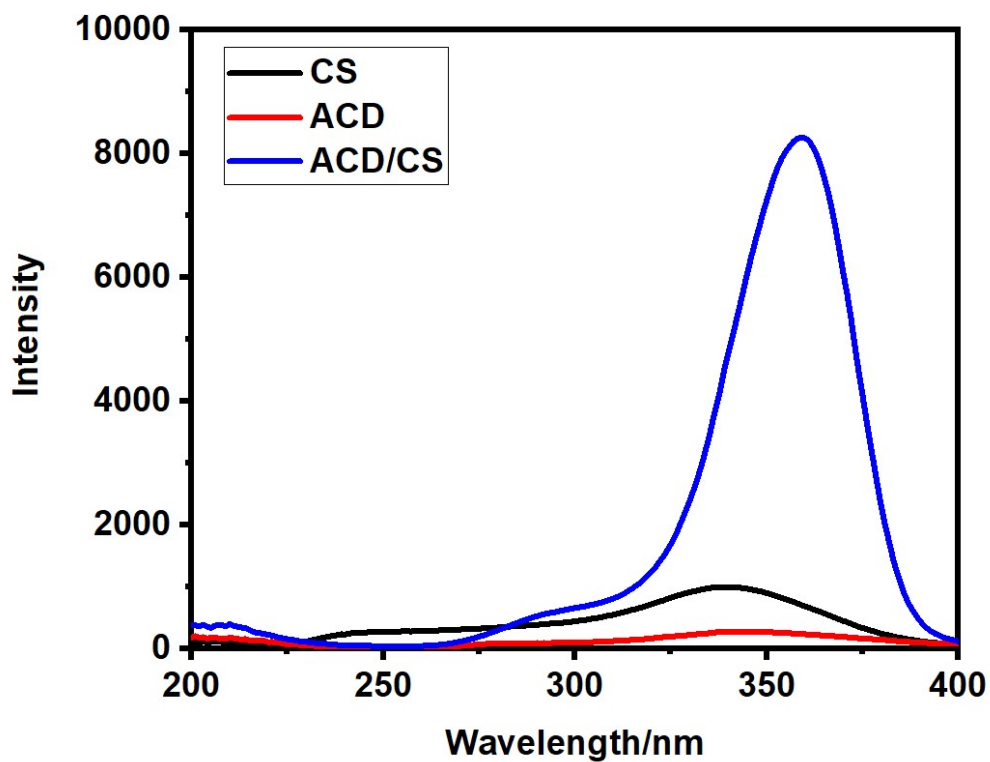

**Figure S6.** Excitation spectrum of CS, ACD and ACD/CS ( $\lambda_{em} = 425$  nm).

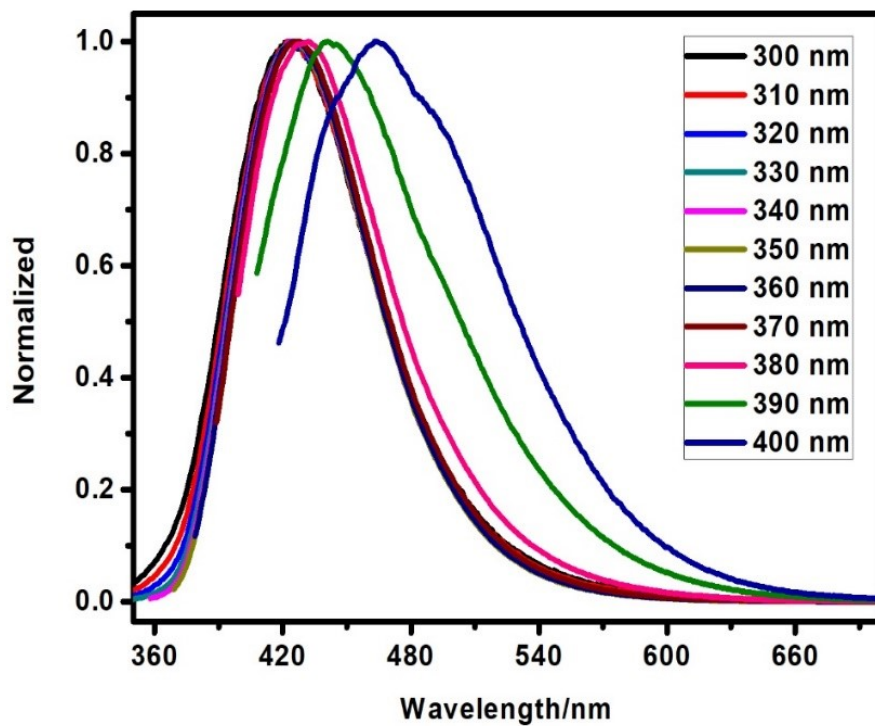

Figure S7. Fluorescence spectrum of ACD/CS under different excitation wavelength.

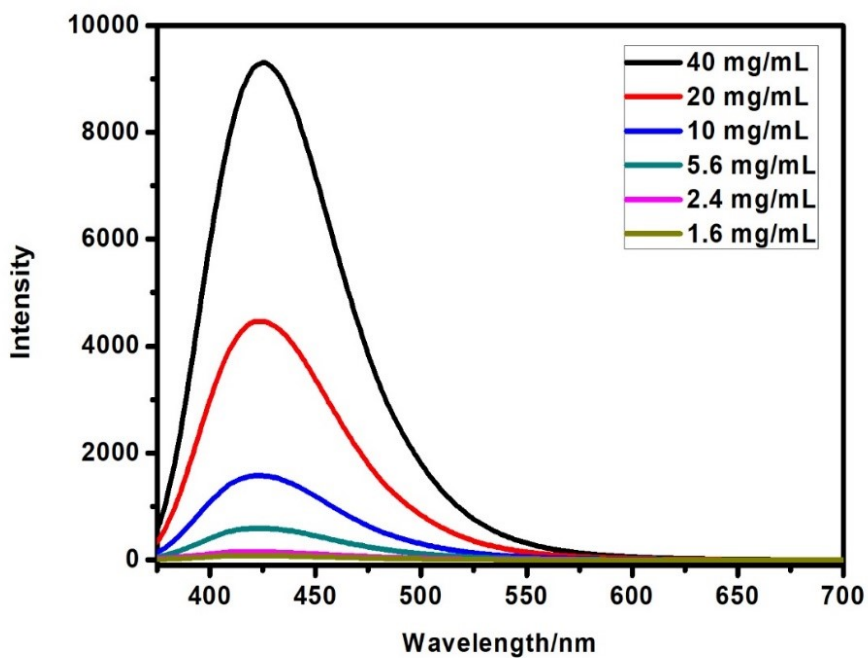

Figure S8. Fluorescence spectrum of ACD/CS in different concentrations.

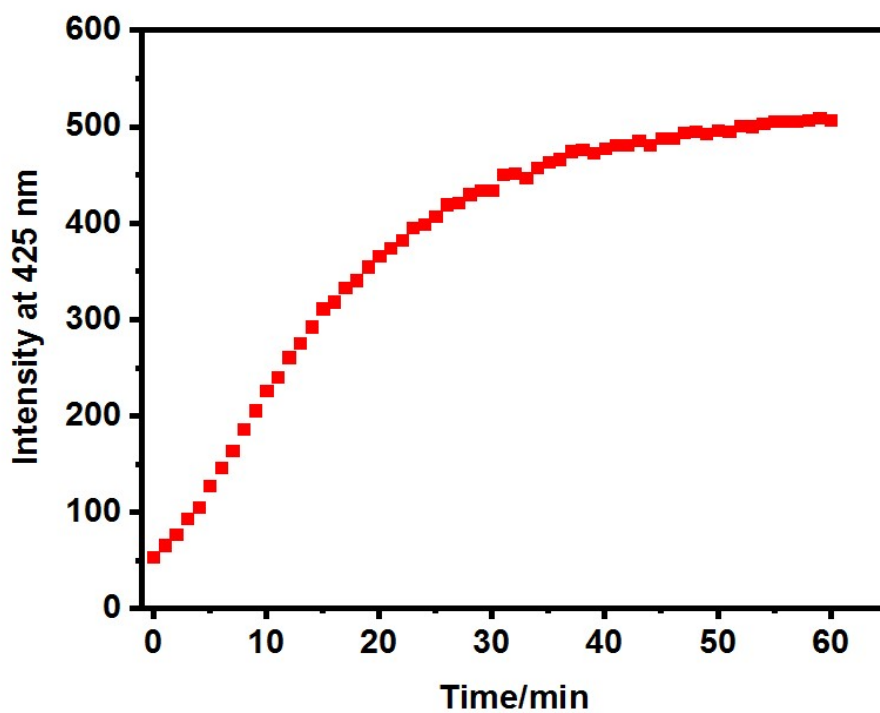

Figure S9. Fluorescence intensity of ACD/CS in different heating time at 50 °C.

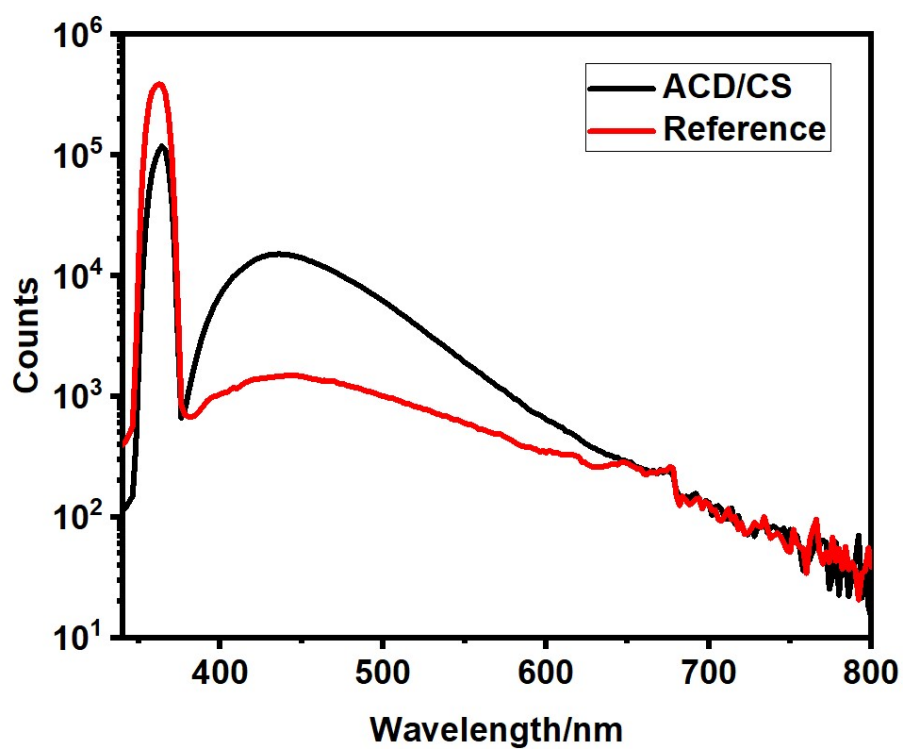

Figure S10. The absolute fluorescence quantum yield of ACD/CS (32.25%).

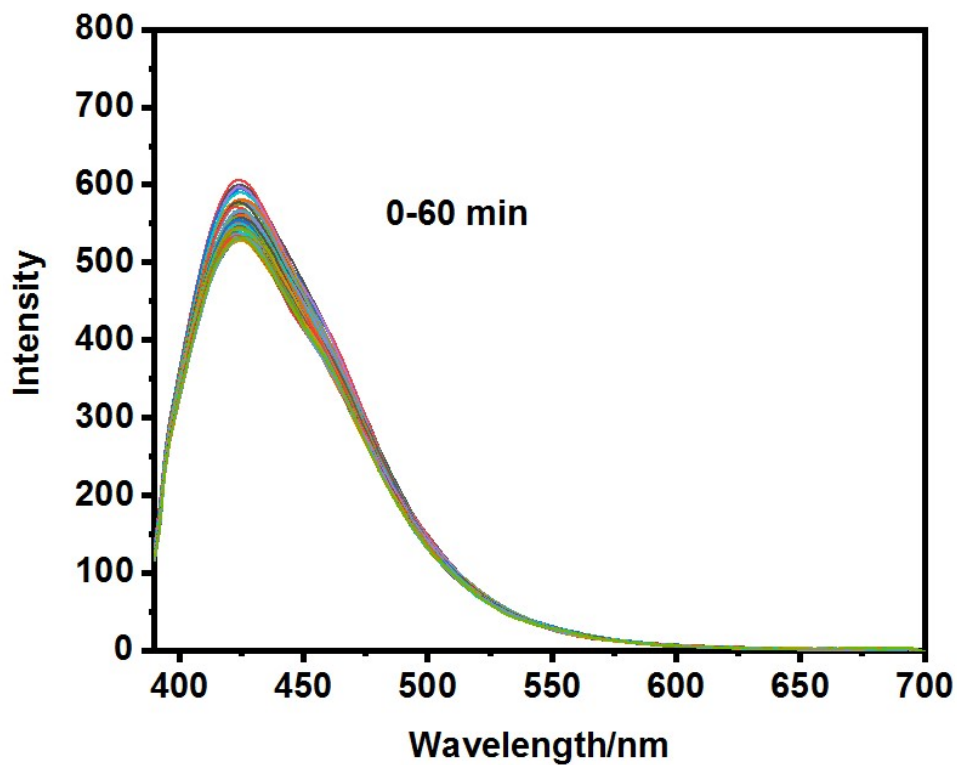

**Figure S11** Fluorescence spectrum of ACD/CS hydrogel under different illumination time ( $\lambda_{\text{ex}} = 360 \text{ nm}$ ).

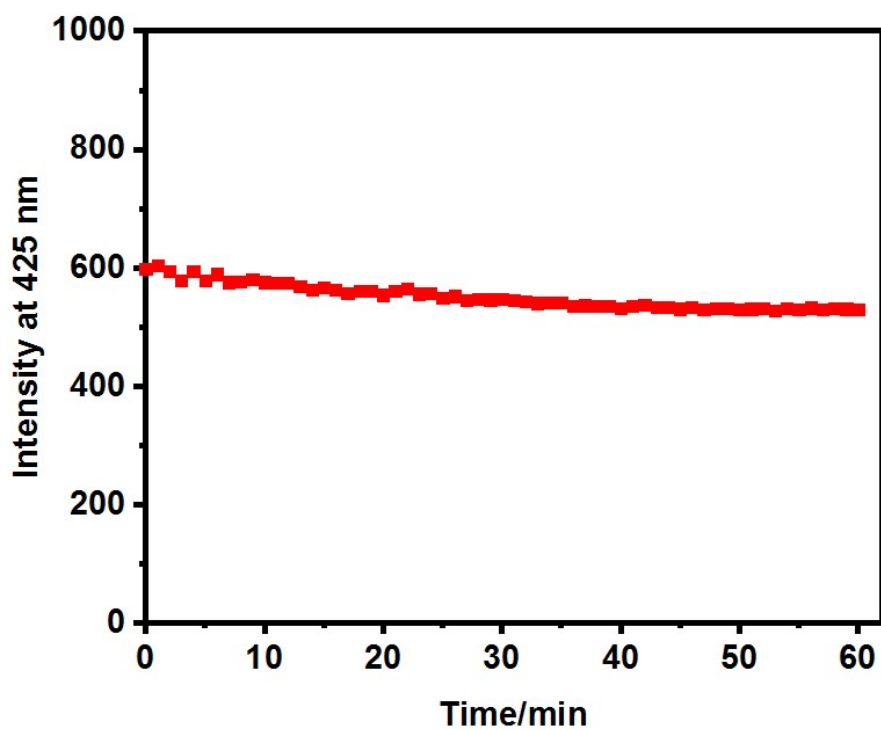

**Figure S12.** Fluorescence intensity of ACD/CS at 425 nm under different illumination time ( $\lambda_{\text{ex}} = 360 \text{ nm}$ ).



### 3. The Synthesis of TPA:

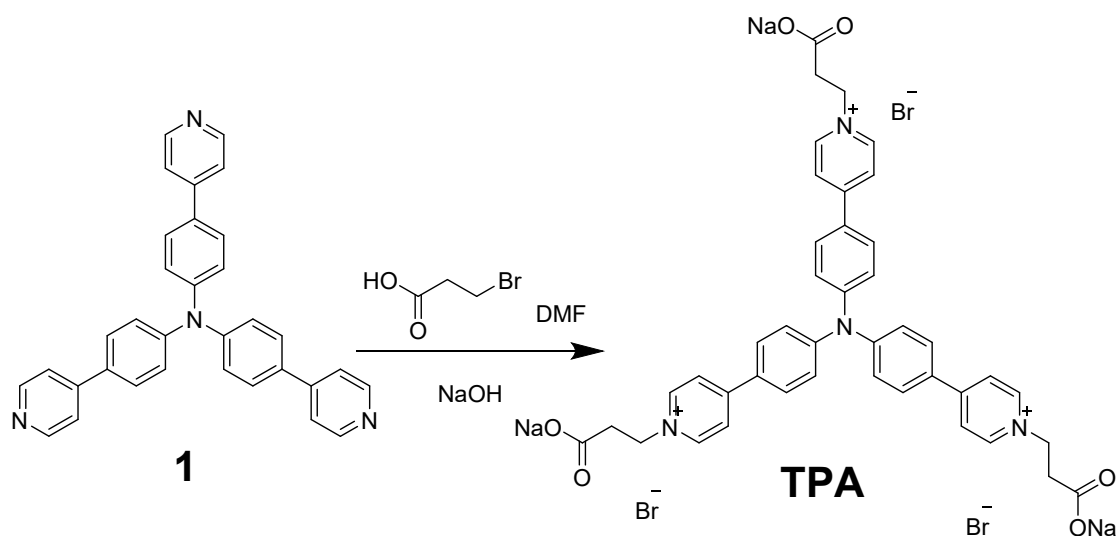

Compound 1 (200 mg, 0.42 mmol) and 3-Bromopropionic acid (385 mg, 2.52 mmol) were added in dry DMF and refluxed for 2 days. After that the above reaction mixture was poured in diethyl ether to give yellow precipitate, then filtrated. The yellow solid was dissolved in CH<sub>3</sub>OH, then added to the ethanol solution of NaOH give yellow precipitate, then filtrated and dried to give TPA (0.11 g, yield 26.2 %). <sup>1</sup>H NMR (400 MHz, D<sub>2</sub>O) δ 8.81 (d, *J* = 6.8 Hz, 6H), 8.27 (d, *J* = 6.8 Hz, 6H), 7.97 (d, *J* = 8.8 Hz, 6H), 7.45 (d, *J* = 8.7 Hz, 6H), 4.83-4.82 (m, 6H), 3.13 (t, *J* = 6.3 Hz, 6H). <sup>13</sup>C NMR(100 MHz, D<sub>2</sub>O): δ 173.96, 155.25, 149.57, 144.39, 129.57, 128.84, 125.12, 123.80, 55.97, 34.66.

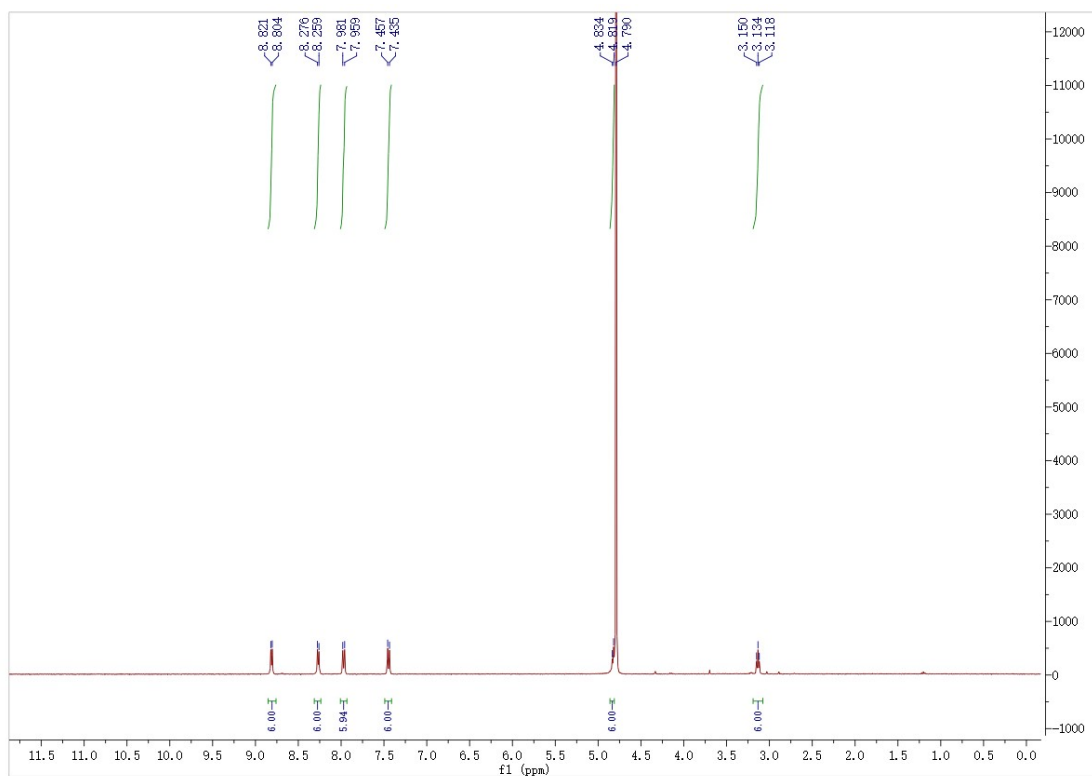

Figure S13.  $^1\text{H}$  NMR (400 MHz) spectrum of TPA in  $\text{D}_2\text{O}$  at room temperature.

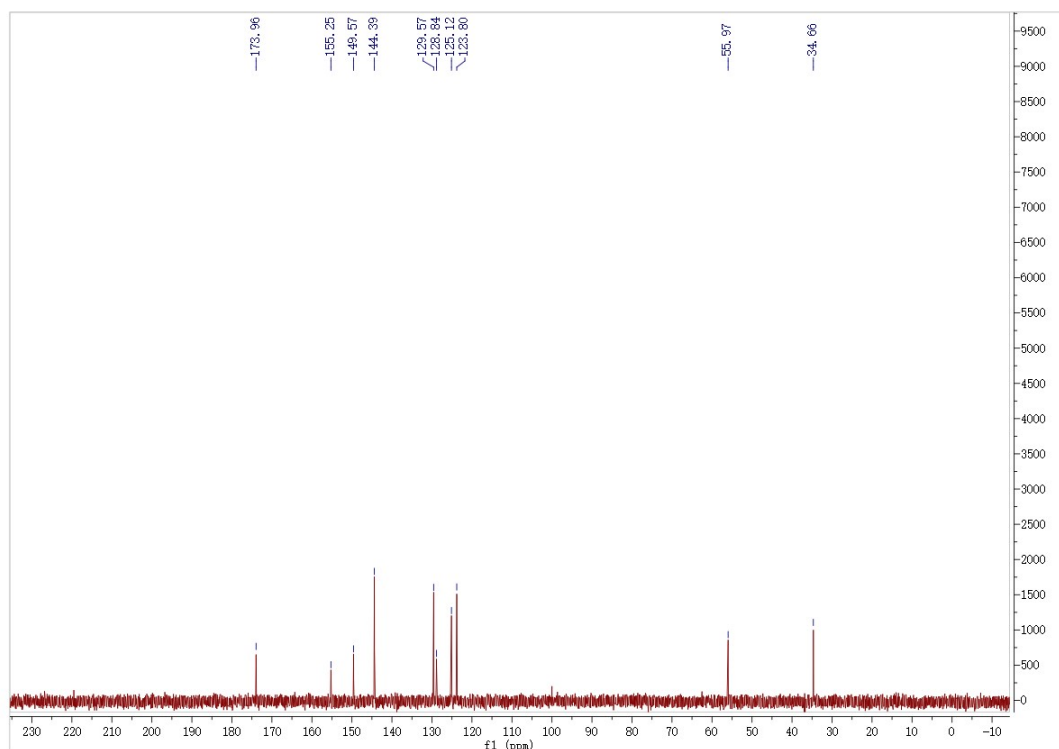

Figure S14.  $^{13}\text{C}$  NMR (100 MHz) spectrum of TPA in  $\text{D}_2\text{O}$  at room temperature.

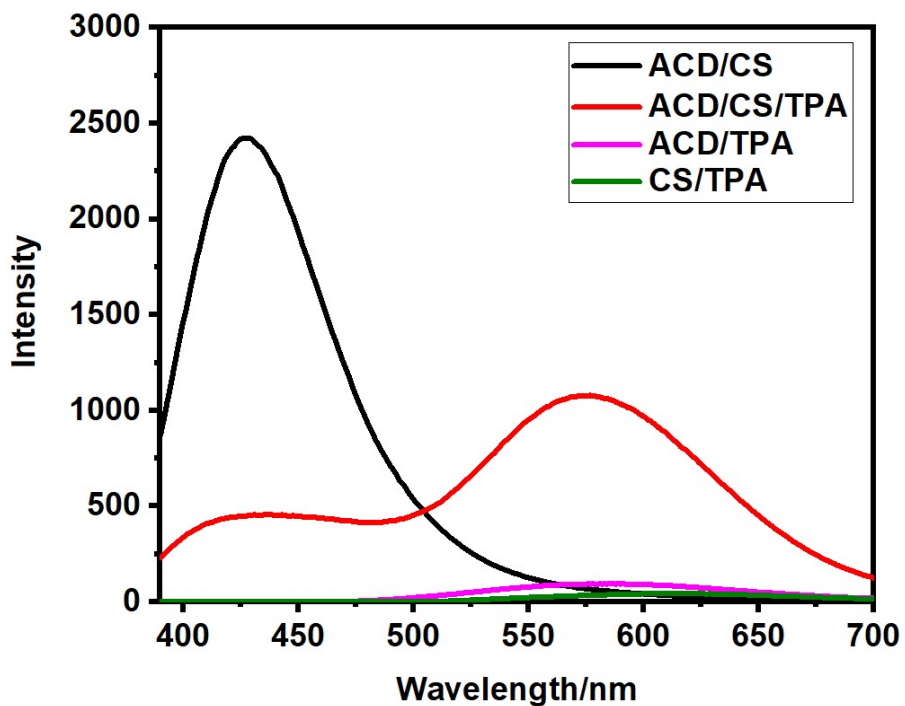

**Figure S15.** Fluorescence spectrum of ACD/CS, ACD/CS/TPA, ACD/TPA and CS/TPA ( $\lambda_{\text{ex}}=360$  nm).

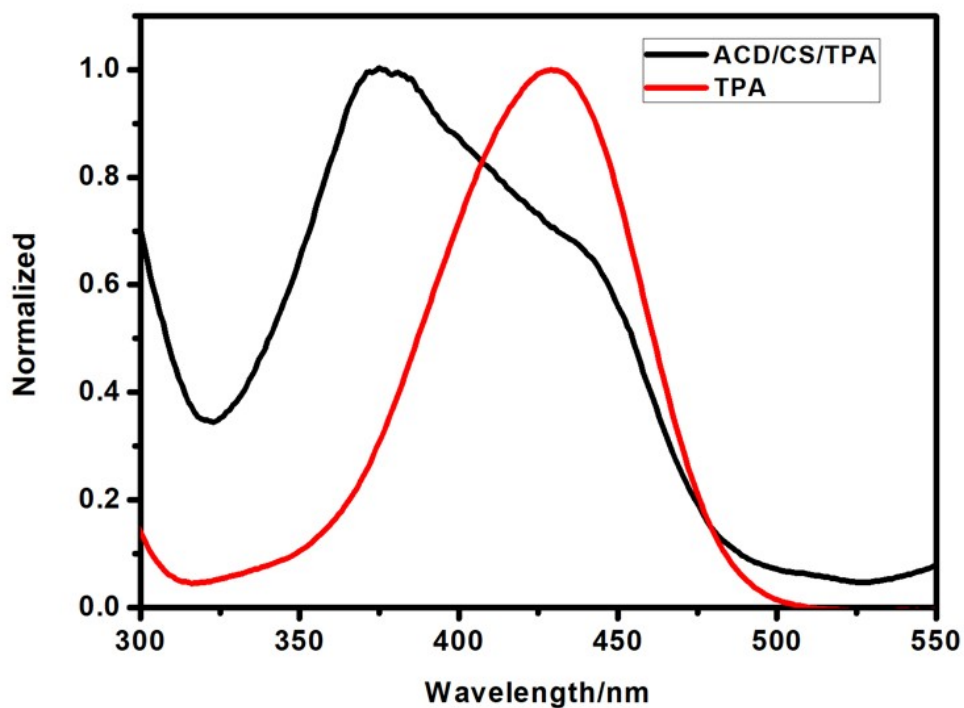

**Figure S16** Normalized excitation spectrum of ACD/CS/TPA ( $\lambda_{\text{em}}=577$  nm) and UV-vis spectra of TPA.

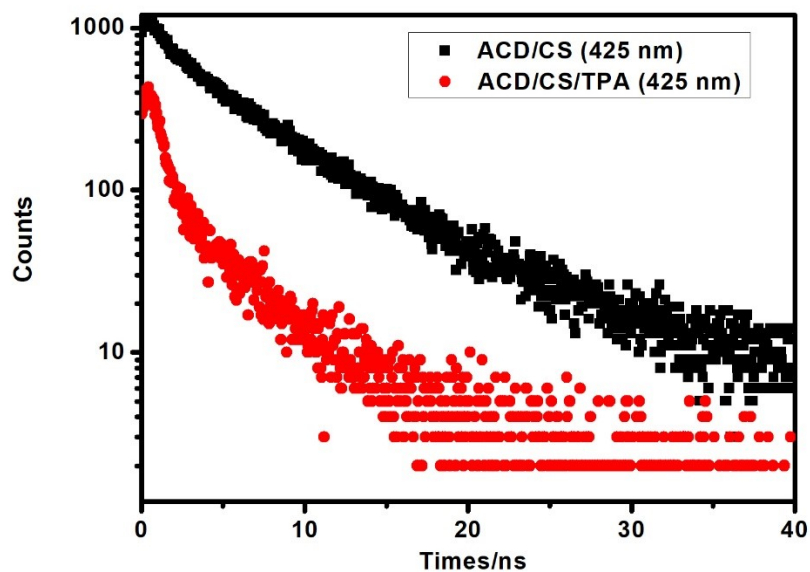

**Figure S17.** Time-resolved fluorescence decay spectra of ACD/CS ( $\tau = 6.04$  ns) and ACD/CS/TPA ( $\tau = 3.36$  ns).

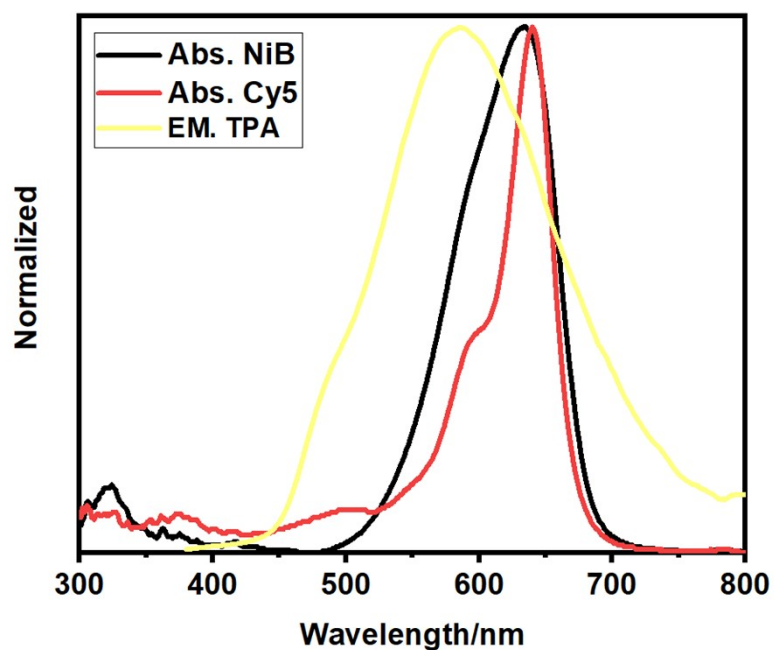

**Figure S18.** Normalized fluorescence spectrum of TPA and absorption band of NiB or Cy5.

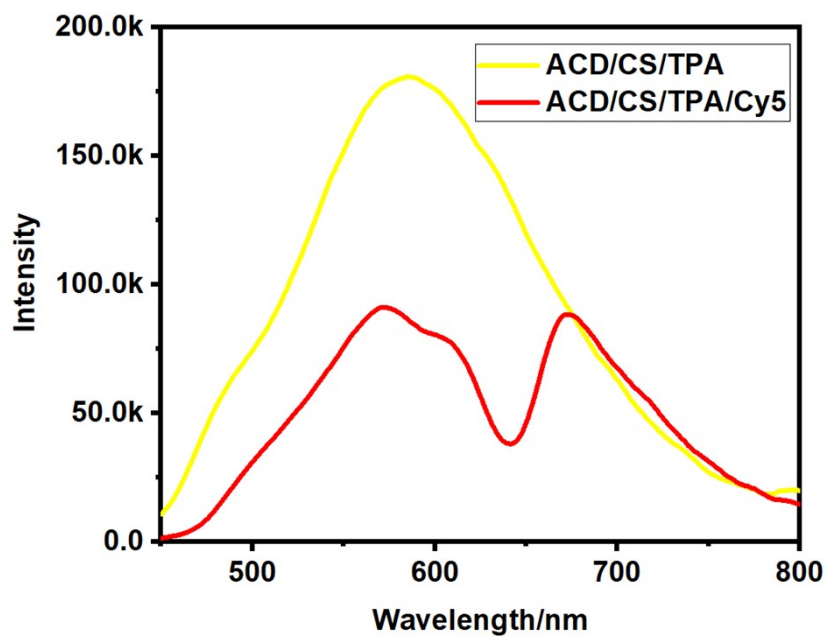

**Figure S19.** Fluorescence spectrum of ACD/CS/TPA and ACD/CS/TPA/Cy5.

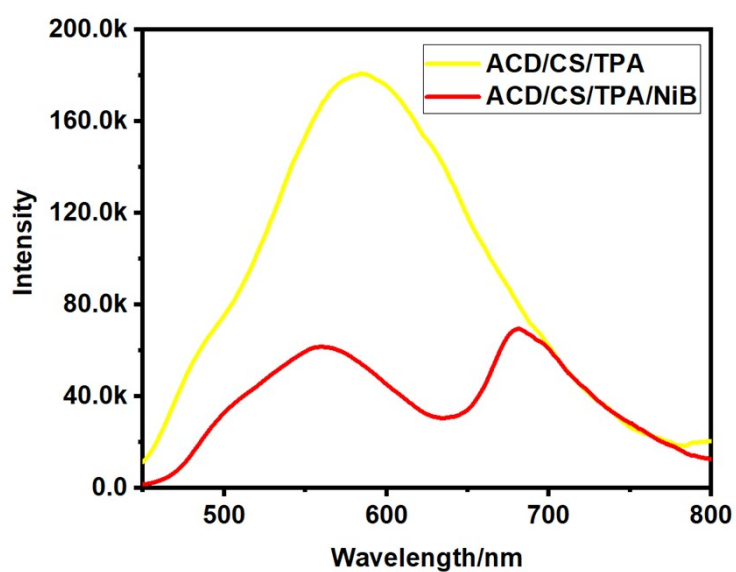

**Figure S20.** Fluorescence spectrum of ACD/CS/TPA and ACD/CS/TPA/NiB.

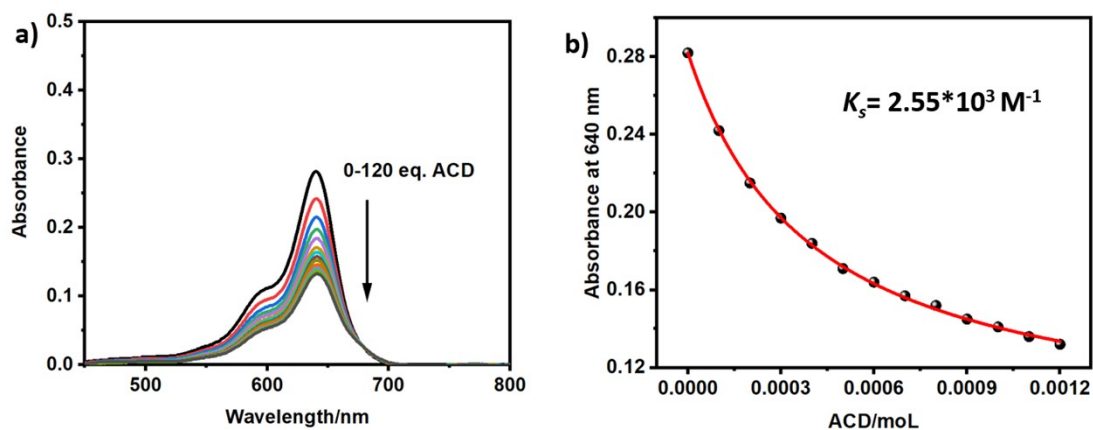

**Figure S21.** (a) Absorption band of Cy5 in the present of different amount of ACD ( $[\text{Cy5}] = 1 \times 10^{-5} \text{ M}$ ). (b) The binding constant value ( $K_s$ ) was calculated based on the nonlinear least-squares analysis of the absorbance intensity changes of Cy5 upon addition of ACD at 640 nm.

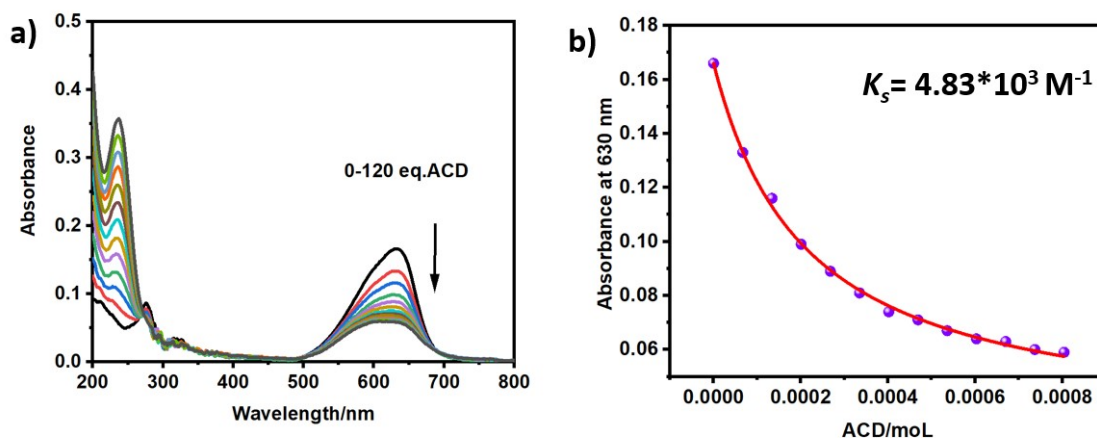

**Figure S22.** (a) Absorption band of NiB in the present of different amount of ACD ( $[\text{NiB}] = 1 \times 10^{-5} \text{ M}$ ). (b) The binding constant value ( $K_s$ ) was calculated based on the nonlinear least-squares analysis of the absorbance intensity changes of NiB upon addition of ACD at 630 nm.

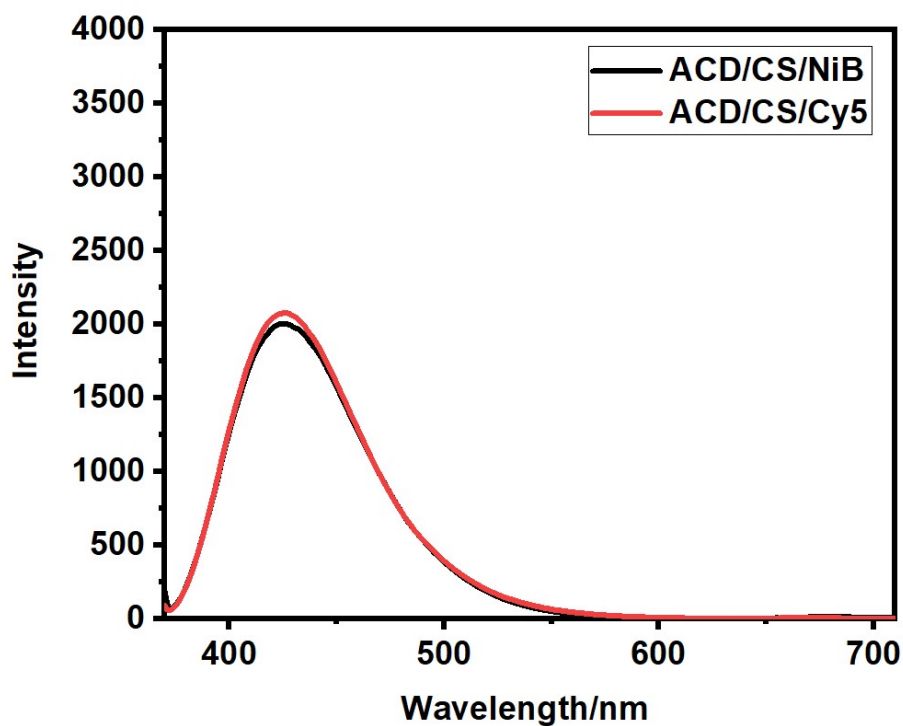

**Figure S23.** Fluorescence spectrum of ACD/CS/Cy5 and ACD/CS/ NiB.

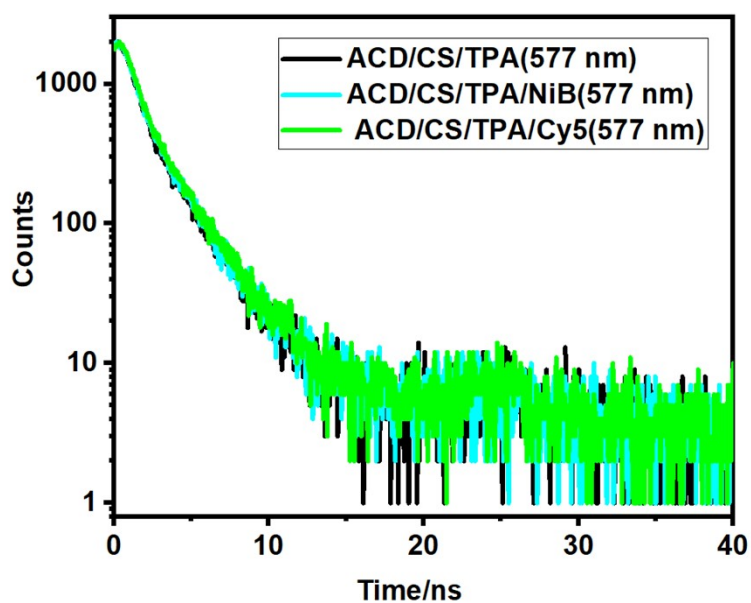

**Figure S24.** Time-resolved fluorescence decay spectra of of ACD/CS/TPA ( $\tau = 2.37$  ns), ACD/CS/TPA/NiB ( $\tau = 2.29$  ns) and ACD/CS/TPA/Cy5 ( $\tau = 2.32$  ns).

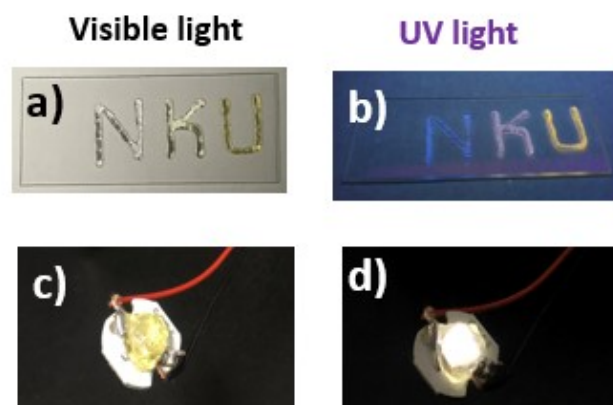

**Figure S25.** ACD/CS hydrogel doped with different ratios of TPA (1000:0, 1000:5 and 100:1, respectively) on glass plate under visible light a) and 365 nm light b). ACD/CS/TPA hydrogel (1000:5) coated on the surface of the diode (365 nm UV light) switch-off c) and switch-on d).

#### 4. Cell imaging experiments.

A549 cells were purchased from Cell Resource Center, China Academy of Medical Science Beijing, China, and then pre-cultured for 24 h. After incubated with ACD/CS/TPA/Cy5 or ACD/CS/TPA/NiB hydrogels for 12 h, respectively. After that, the sample was washed three times with PBS, then observed by confocal laser scanning microscopy.

#### 5. Cytotoxicity Experiments.

NIH 3T3 cells were purchased from Cell Resource Center, China Academy of Medical Science Beijing, China, and then pre-cultured for 24 h. After that the NIH 3T3 cells were further incubated with ACD/CS for 24 h.



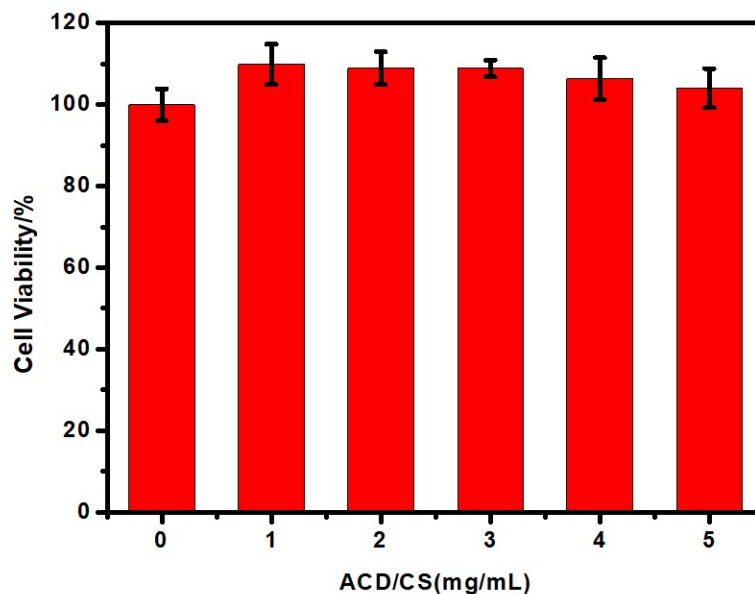

**Figure S26.** The survival rate of NIH 3T3 cells after incubated with ACD/CS for 24 hours.

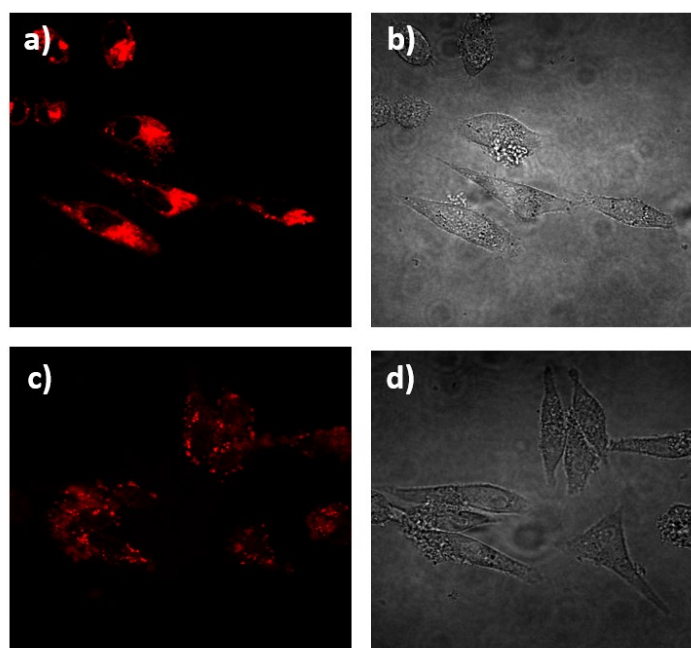

**Figure S27.** Laser scanning confocal microscopy image of A549 cells treated with supramolecular hydrogel. a) ACD/CS/TPA/Cy5. b) Bright field of ACD/CS/TPA/Cy5. c) ACD/CS/TPA/NiB. d) Bright field of ACD/CS/TPA/NiB.

### Reference

[1] Q.J. Li, D.D. Wang, X. Fang, B.Y. Zong, Y. Liu, Z. Li, S. Mao, K. K. Ostrikov, *Chem. Commun.* **2021**, 57, 1161-1164.
